# Supplementary material for: Zootechnical Brown Trout (Salmo trutta L. 1758) Ovarian Fluid Fails to Upregulate the Swimming Performances of Native Mediterranean Brown Trout (Salmo cettii Rafinesque, 1810) Sperm in the Biferno River
Source: MDPI journal article supplement (doi:10.3390/fishes8040190), 2023-03-31
Supplement: s1 [file s1]

**Table S1.** Sperm motility parameters of Mediterranean trout (N=10) activated in artificial medium (AM)

| <b>Sperm traits</b>     | <b>(means <math>\pm</math> SD)</b> |
|-------------------------|------------------------------------|
| MOT (%)                 | 94.41 $\pm$ 2.21                   |
| VCL ( $\mu\text{m/s}$ ) | 190.97 $\pm$ 20.25                 |
| VAP ( $\mu\text{m/s}$ ) | 150.20 $\pm$ 15.70                 |
| VSL ( $\mu\text{m/s}$ ) | 85.89 $\pm$ 18.75                  |
| STR (%)                 | 55.39 $\pm$ 8.74                   |
| LIN (%)                 | 44.85 $\pm$ 9.81                   |
| ALH ( $\mu\text{m}$ )   | 5.19 $\pm$ 1.50                    |
| BCF (Hz)                | 4.21 $\pm$ 1.20                    |
| DSM (sec)               | 40.10 $\pm$ 6.12                   |

**Table S2.** Seminal plasma and ovarian fluid pH measured for each male and female

| <b>ID Male</b> | <b>pH</b> | <b>OF samples</b> | <b>pH</b> |
|----------------|-----------|-------------------|-----------|
| M1             | 7.53      | Native 1          | 8.24      |
| M2             | 7.81      | Native 2          | 8.45      |
| M3             | 8.15      | Native 3          | 8.41      |
| M4             | 7.94      | Native 4          | 8.43      |
| M5             | 7.93      | Native 5          | 8.28      |
| M6             | 8.14      | Zootechnical 1    | 8.59      |
| M7             | 7.77      | Zootechnical 2    | 8.74      |
| M8             | 7.83      | Zootechnical 3    | 8.63      |
| M9             | 7.90      | Zootechnical 4    | 8.22      |
| M10            | 8.10      | Zootechnical 5    | 8.63      |
